# Supplementary material
Source: publisher site journal article supplement (https://en-cdn.bio-protocol.org/attached/file/20200902/3756%20Supplementary%20table%20S1.docx)
Supplement: Supplementary file 1 [file 3756%20Supplementary%20table%20S1.docx]

**Supplementary table S1:** Summary of a representative acquisition method for BSA, for Orbitrap Fusion Tribrid (Thermo Scientific) with Instrument Control Software 3.0

Application Mode: **Peptide**

Method Duration (min): **30**

Global Parameters

Ion Source

Ion Source Type: **NSI**

Spray Voltage: **Static**

Positive Ion (V): **0**

Negative Ion (V): **600**

Positive Ion

| Positive Ion | |
| --- | --- |
| Time (min) | Voltage (V) |
| 0 | 0 |

Negative Ion

| Negative Ion | |
| --- | --- |
| Time (min) | Voltage (V) |
| 0 | 0 |

Sweep Gas (Arb): **0**

Ion Transfer Tube Temp (°C): **170**

Use Ion Source Settings from Tune: **False**

FAIMS Mode: **Not Installed**

MS Global Settings

Infusion Mode: **Liquid Chromatography**

Expected LC Peak Width (s): **30**

Default Charge State: **1**

Internal Mass Calibration: **Off**

Start Time (min): **0**

End Time (min): **30**

Cycle Time (sec): **50000**

Master Scan:

MS OT

Detector Type: **Orbitrap**

Orbitrap Resolution: **240000**

Mass Range: **Normal**

Use Quadrupole Isolation: **True**

Scan Range (m/z): **200-1200**

RF Lens (%): **65**

Master Scan: MS OT (Contd)

AGC Target: **Custom**

Normalized AGC Target (%): **1250**

Maximum Injection Time Mode: **Custom**

Maximum Injection Time (ms): **3000**

Microscans: **10**

Data Type: **Profile**

Polarity: **Positive**

Source Fragmentation: **Disabled**

Scan Description:

Filters:

MIPS

Monoisotopic Peak Determination: **Peptide**

Data Dependent

Data Dependent Mode: **Cycle Time**

Time between Master Scans (sec): **50000**

Scan Event Type 1:

Scan:

ddMS² OT HCD

Isolation Mode: **Quadrupole**

Isolation Window (m/z): **0.4**

Isolation Offset: **Off**

Activation Type: **HCD**

Collision Energy Mode: **Fixed**

HCD Collision Energy (%): **30**

Detector Type: **Orbitrap**

Orbitrap Resolution: **7500**

Mass Range: **Normal**

Scan Range Mode: **Auto**

AGC Target: **Custom**

Normalized AGC Target (%): **40**

Maximum Injection Time Mode: **Custom**

Maximum Injection Time (ms): **3000**

Microscans: **1**

Data Type: **Centroid**

Use EASY-IC™: **False**

Scan Description:
